# Supplementary material
Source: publisher site journal article supplement (https://www.spandidos-publications.com/6084/downloadSupplementary)
Supplement: Supplementary file 1 [file downloadSupplementary]

## Sheet: Supplementary Table1
Table SI. Time course of treatment.
Year	Time since initial visit	Event	Treatment	Histology
Feb.2009	0 m	Initial visit	Biopsy	OKC
Mar.2009	0 y 1 m	Operation [1st]	Extraction of right maxillary lesion; radical surgery of the maxillary sinus and formation of a nasoantral window	OKC
Jun.2011	2 y 4 m	Recurrence [2nd] (Right upper canine and first premolar tooth area)	Enucleation	SOKC/Keratoameloblastoma
Feb.2013	4 y 0 m	Recurrence [3rd] (Right upper canine and first premolar tooth area)	Enucleation	SOKC/Keratoameloblastoma
Aug.2016	7 y 6 m	Recurrence [4th] (Right upper canine tooth, first and second premolar tooth area)	Enucleation and extraction of the first premolar	SOKC/Keratoameloblastoma
Sep.2018	9 y 7 m	Recurrence [5th] (Right upper canine tooth, first and second premolar tooth area)	Enucleation	SOKC/Keratoameloblastoma
Aug.2019	10 y 6 m	Recurrence [6th] (Right upper second premolar tooth area)	Enucleation and extraction of the second premolar	SOKC/Keratoameloblastoma
Jun.2022	13 y 4 m	Recurrence [7th] (Right upper central and lateral incisor and canine tooth area)	Enucleation	SOKC/Keratoameloblastoma
Jun.2023	14 y 4 m	No recurrence	-	-
m, months; OKC, odontogenic keratocyst; SOKC, solid variant of OKC; y, years.
